# Supplementary material for: Validation of tropospheric ties at the test setup GNSS co-location site Potsdam
Source: Copernicus journal article supplement (doi:10.5194/amt-2021-87), 2021-05-25

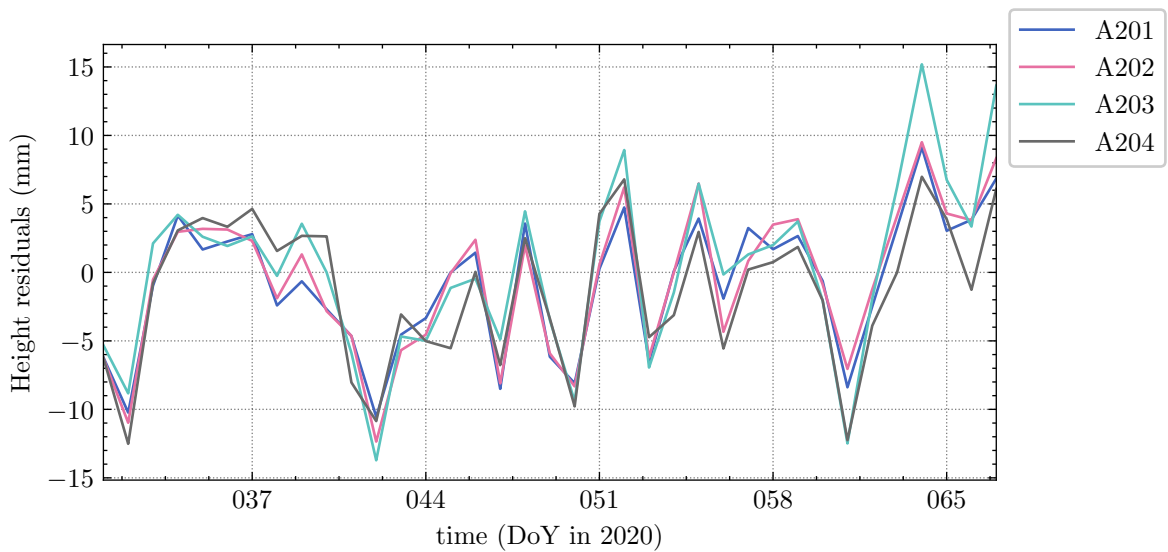

Supplement: Supplementary file [file amt-2021-87-AC1-supplement.zip]
